# Supplementary figures and images for: Berberine plays a cardioprotective role by inhibiting macrophage Wnt5a/β‐catenin pathway in the myocardium of mice after myocardial infarction
Source: PubMed Central journal article supplement — Phytother Res. 2022 Oct 11;37(1):50–61. doi: 10.1002/ptr.7592 (PMC10092487; doi:10.1002/ptr.7592), 2022-10-11

**A**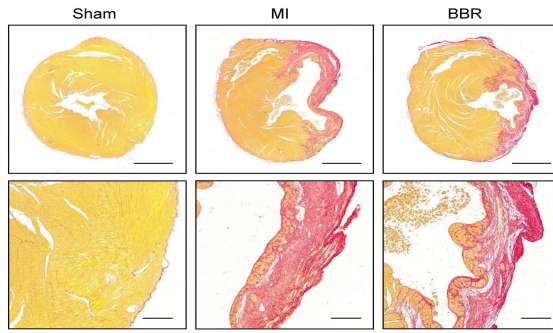**B**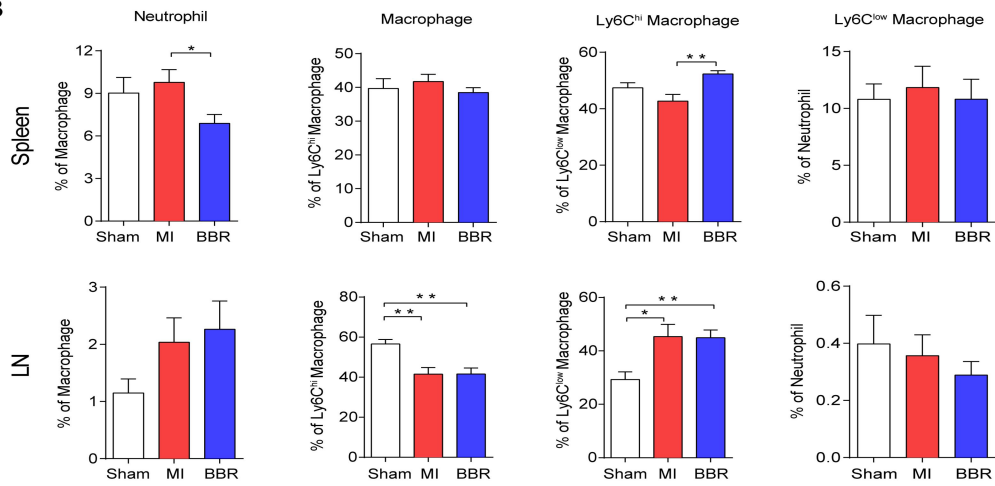**C**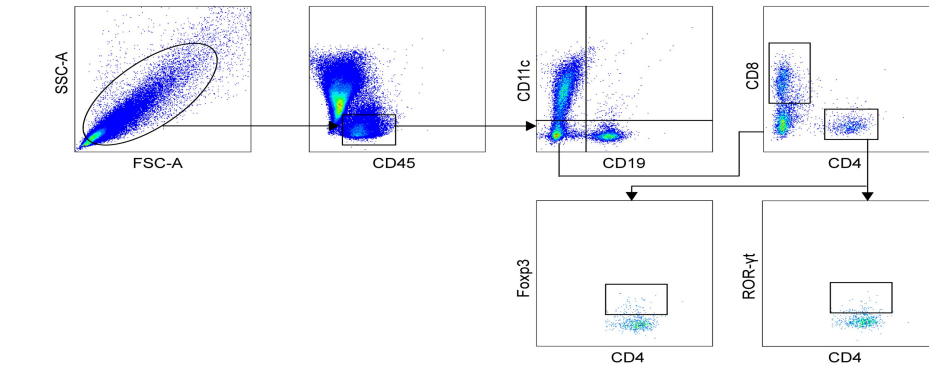**D**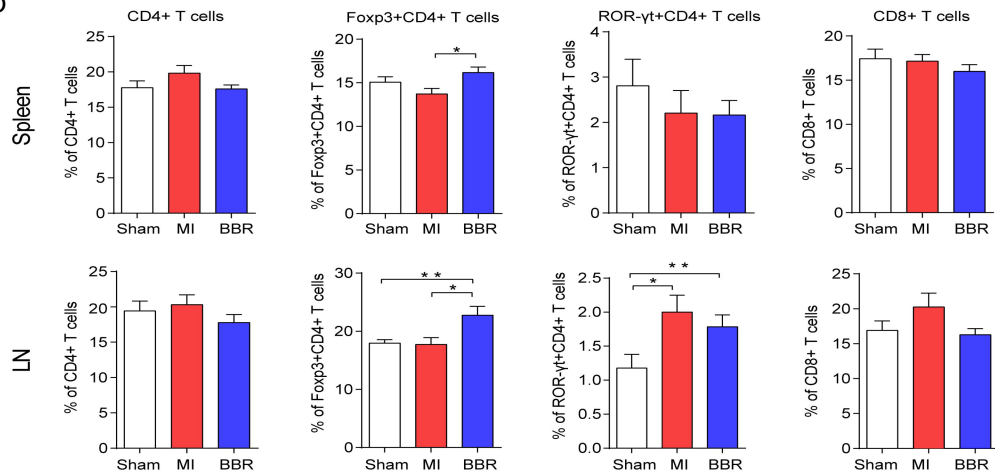

Supplement: PTR-37-50-s002.pdf [file PTR-37-50-s002.pdf]
